# Supplementary material for: Cervical cytology and human papillomavirus among asymptomatic healthy volunteers in Vientiane, Lao PDR
Source: Springer Nature journal article supplement (doi:10.1186/s12885-017-3900-6), 2017-12-01
Supplement: MOESM1 [file 15319612]

Questionnaires for Cervical Cancer Screening by using Self Sampling Device and HPV subtype examination in Lao

PDR

I. Name and Family Name:.....Age:.....Years old

II. Address; Village: District: Province:

III. What is your occupation?

- ①.House wife       ②.Farmer       ③.Government Employee   
④.Private Employee       ⑤.Business owner   
⑥.Other (Specify:.....).

IV. Marital Status (Check in the parenthesis)

- ①.Single       ②.Married       ③ widowed       ④.Devoice

④.Have you ever gotten married?.

- Yes       No

V. Educational Background

- ①. No school       ②. Primary School       ③.Upper Secondary School   
④.High School       ⑤.College or University

VI. About Pregnancy.

How many time did your pregnant?.

- ①.Pregnancy:.....Time.      ②.Don't know

- ③.How may children did you give birth?:.....,      ④.Never pregnant

VII. About Cervical cancer.

Have your family member suffered with Cervical Cancer?.

- ①.Yes       ②.No

②.If Yes, who are they?.

- Mother       Older sister       Younger sister       Relative

VIII. Knowledge about Cervical Cancer Screening.

1) Which one is the most effective of Cervical Cancer Screening?

- ①.Come to hospital to carry out Cervical cytology every 2 or 3 year and follow up in case presence of abnormal Cervical cells

- ②.Go to see the doctor in case of Vaginal bleeding

2) Which one is the best answer for The evaluation of Cervical cancer cells:

①.Cancer cells in Cervical cancer are different from Cancer cell in other system

②. HPV is the most common cause of Cervical cell dysplasia and develop into Carcinoma

3) What is Cervical Cytology examine? Which one is correct: (Check the Parenthesis)

①.Cytology is an examination to check the status of cell in human body

②.Cytology cannot identify the Disease

#### IX. Experience about Cervical Cancer Screening

Have you ever had a screening program for cervical cancer?

①.No       ②.Yes

If Yes:

②.1.How often do you have: .....Time;      Don't know

②.2.Where did you go for Cervical cancer screening?

Hospital       Private Clinic       Both Hospital and Private Clinic

②.3.When do you usually go to see the doctor for Cervical cancer screening?

3 Months/Year       6 Months/Year       Every Month       Every Years

②.4.How about the result?

Normal       Inflammation       Mild Dysplasia       Carcinoma

#### X. Expression about Cervical cancer screening program

①.How do you think about Cervical cancer screening by using self-sampling device?

Very good       Good       Not sure       Not good       Very bad

#### XI. Which one do you prefer between Self sampling method and Gynecological examination?

①.I prefer self - sampling method

②. I prefer Gynecological examination

③.Don't know

④.I prefer both

XII.Other comment about Cervical cancer screening program
